# Supplementary material for: Synergistic effects of plasmon induced Ag@Ag3VO4/ZnCr LDH ternary heterostructures towards visible light responsive O2 evolution and phenol oxidation reactions
Source: Royal Society of Chemistry journal article supplement (doi:10.1039/c7qi00742f), 2018-01-01
Supplement: c7qi00742f1.pdf [file c7qi00742f1.pdf]

## Supporting Information

### Synergistic effect of plasmon induced Ag@Ag<sub>3</sub>VO<sub>4</sub>/ZnCr LDH ternary heterostructure towards visible light responsive O<sub>2</sub> evolution and phenol oxidation reaction

Dipti Prava Sahoo, Sulagna Patnaik, Dharitri Rath, Kulamani Parida\*

Centre for Nano science and Technology, Siksha O Anusandhan Deemed to be University,  
Bhubaneswar-751030

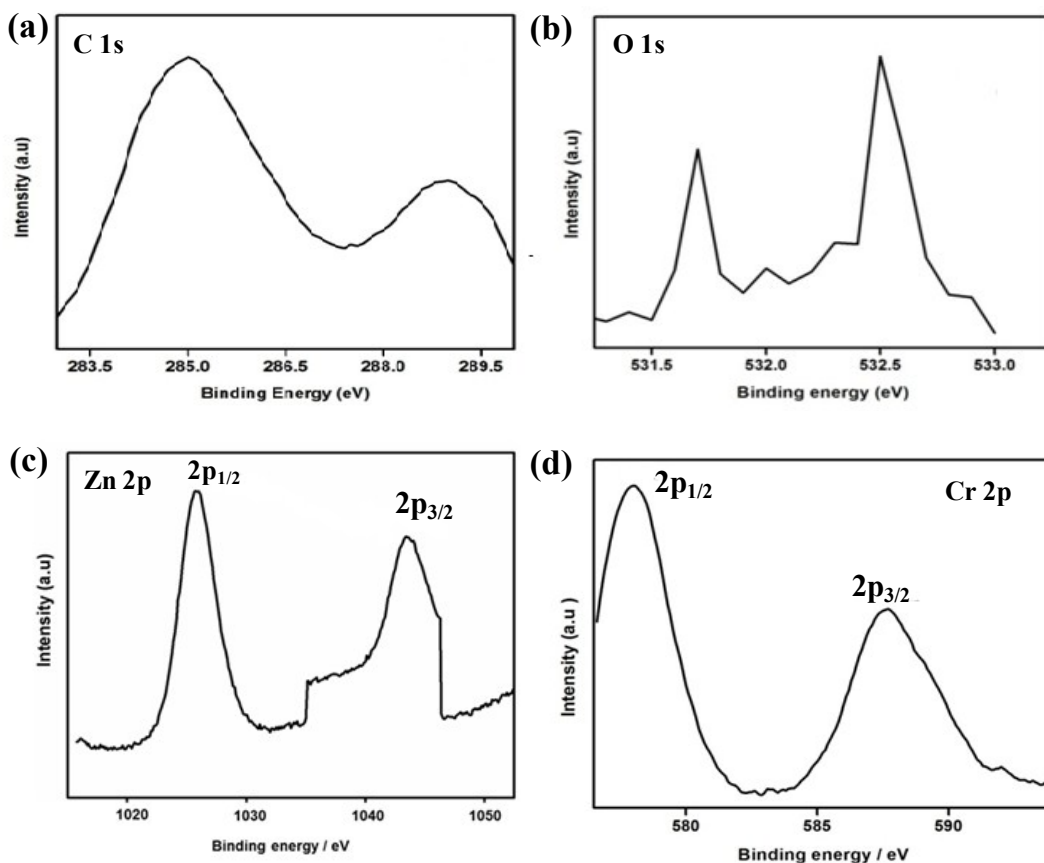

**Fig. S1** XPS spectra of (a) C 1s, (b) O 1s, (c) Zn 2p and (d) Cr 2p.

Table S1: Adsorption study of phenol by varing different pH

| pH | Phenol Adsorption |
|----|-------------------|
| 4  | 19%               |
| 5  | 20.54%            |
| 6  | 23%               |
| 7  | 25%               |
| 8  | 22.8%             |
| 9  | 22.5%             |
| 11 | 21.19%            |

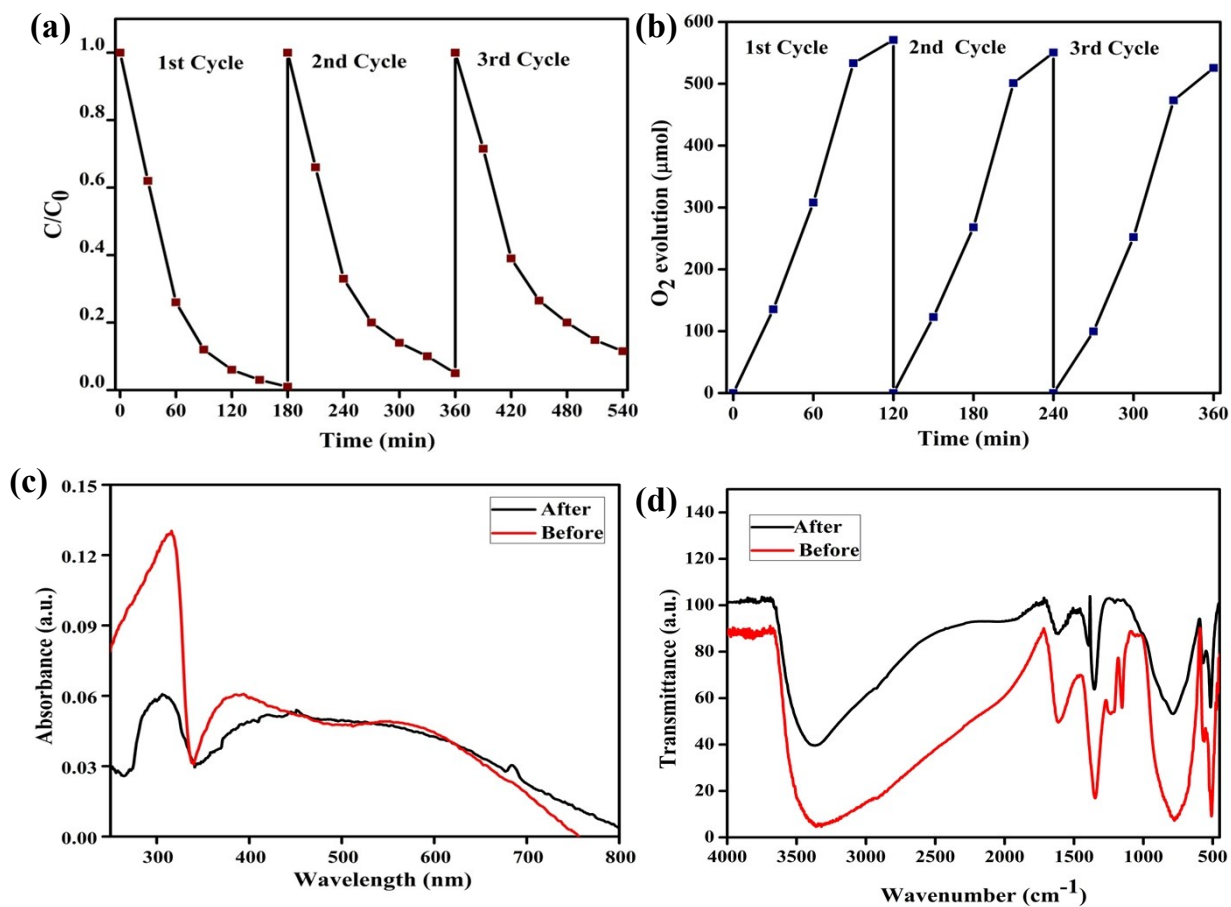

**Fig. S2** Reusability study of (a) oxidation of phenol, (b) volume of  $O_2$  evolution in three consecutive cycles of run in every 3 h and 2 h respectively for 40ALDH catalyst, (c) UV-vis DRS plots and (d) FTIR spectra of 40ALDH nanohybrid with after and before the phenol oxidation.

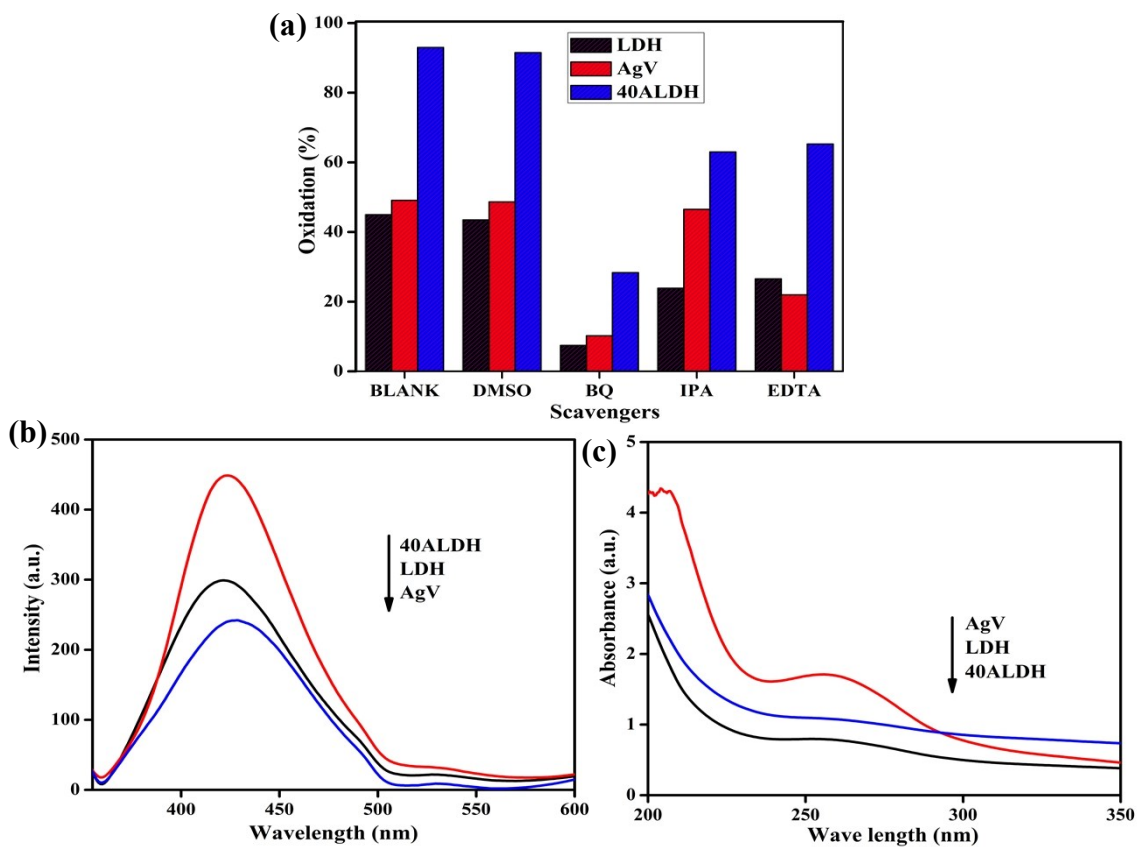

**Fig. S3** (a) Active species trapping experiments over LDH, AgV and 40ALDH, (b) TAOH fluorescence intensities and (c) NBT transformation efficiencies of LDH, AgV and 40ALDH photocatalysts.
